# Supplementary material
Source: PubMed Central journal article supplement (PMC9841369)
Supplement: NIHMS1859371-supplement-Supplemental_Figures.pdf [file NIHMS1859371-supplement-Supplemental_Figures.pdf]

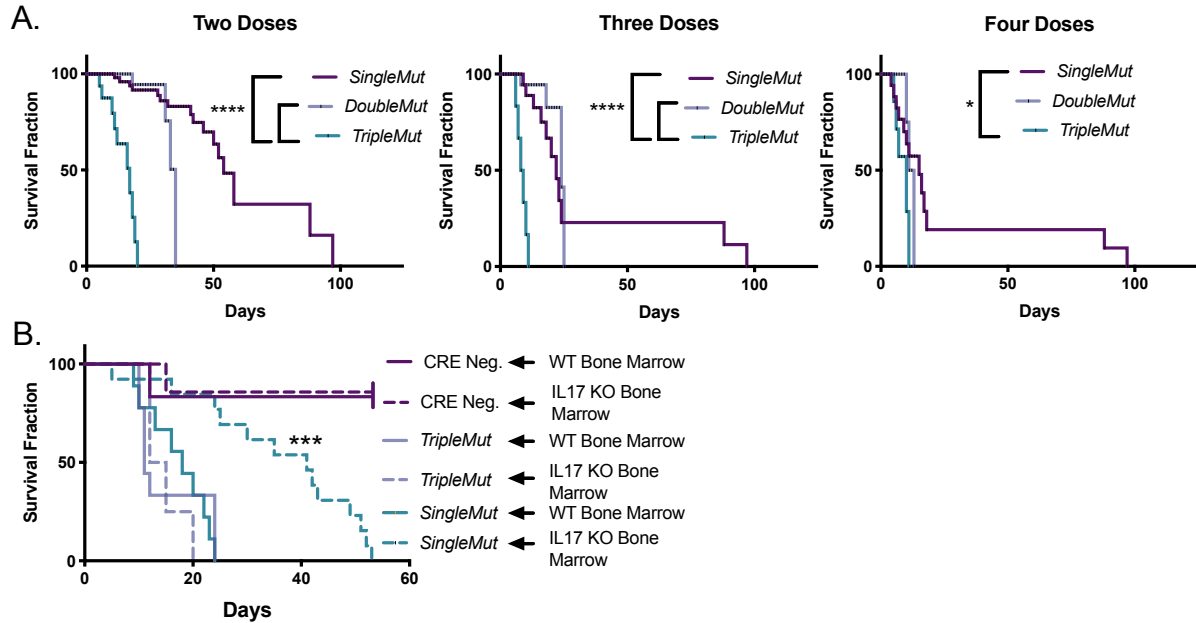

**Figure S1: Dose dependent survival in *SingleMut*, *DoubleMut*, and *TripleMut* mouse model (Related to Figure 1).** A) Mice were induced with the indicated doses of 50 mg/kg tamoxifen and then followed for survival (n=8-10). B) Irradiated mice were i.v. injected with the indicated bone marrow, then followed for survival. (n=4-6). Survival significance is calculated using log-rank test. \*p < 0.05, \*\* p < 0.01, \*\*\* p < 0.001, \*\*\*\* p < 0.0001 unless otherwise indicated. Data is presented as mean  $\pm$  SEM.

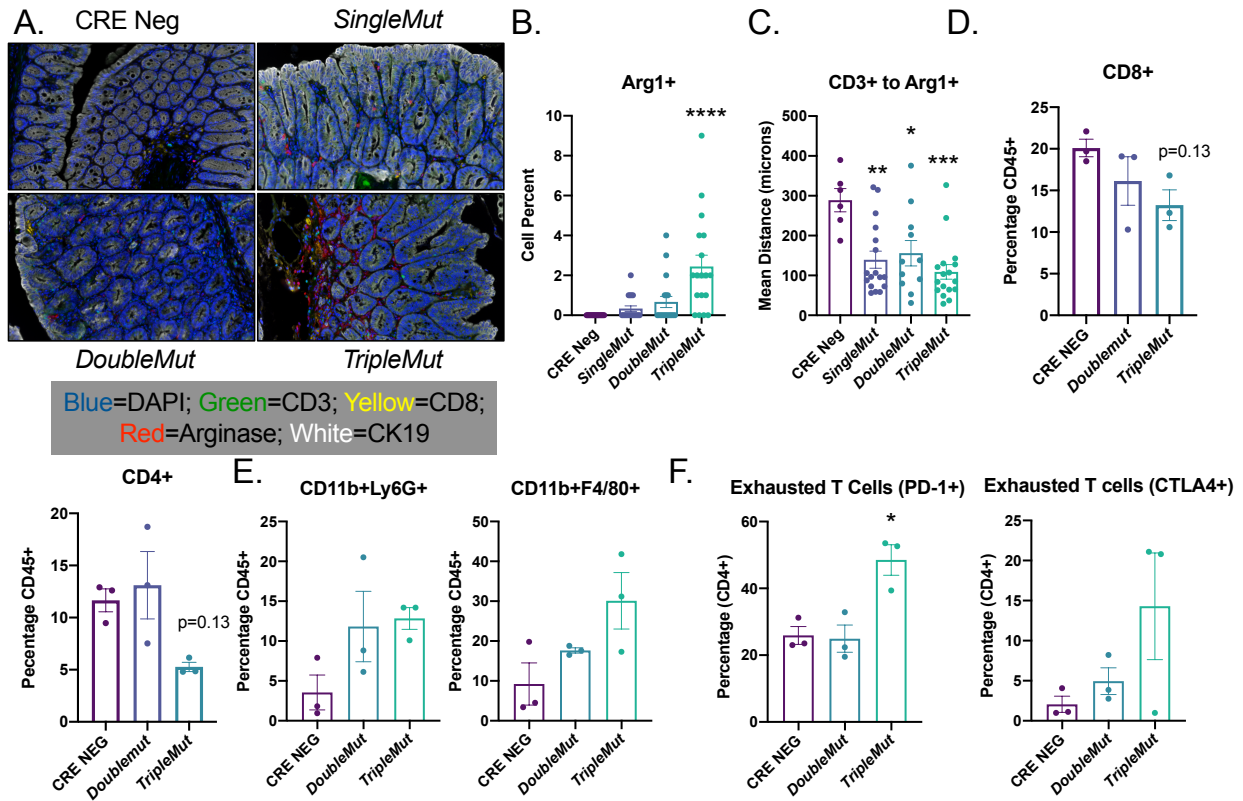

**Figure S2: *TripleMut* mice have altered tumor microenvironment (Related to Figure 2).** A) Representative OPAL multiplex IHC in mouse models of colon cancer induced with 100 mg/kg tamoxifen. B) Quantitation of Arg1<sup>+</sup> cells (n=6-8). C) Average distance between cell populations (n=6-8). D, E, and F) Selected populations from CyToF experiment (n=3). \*p < 0.05, \*\* p < 0.01, \*\*\* p < 0.001, \*\*\*\* p < 0.0001. Data is presented as mean ± SEM.

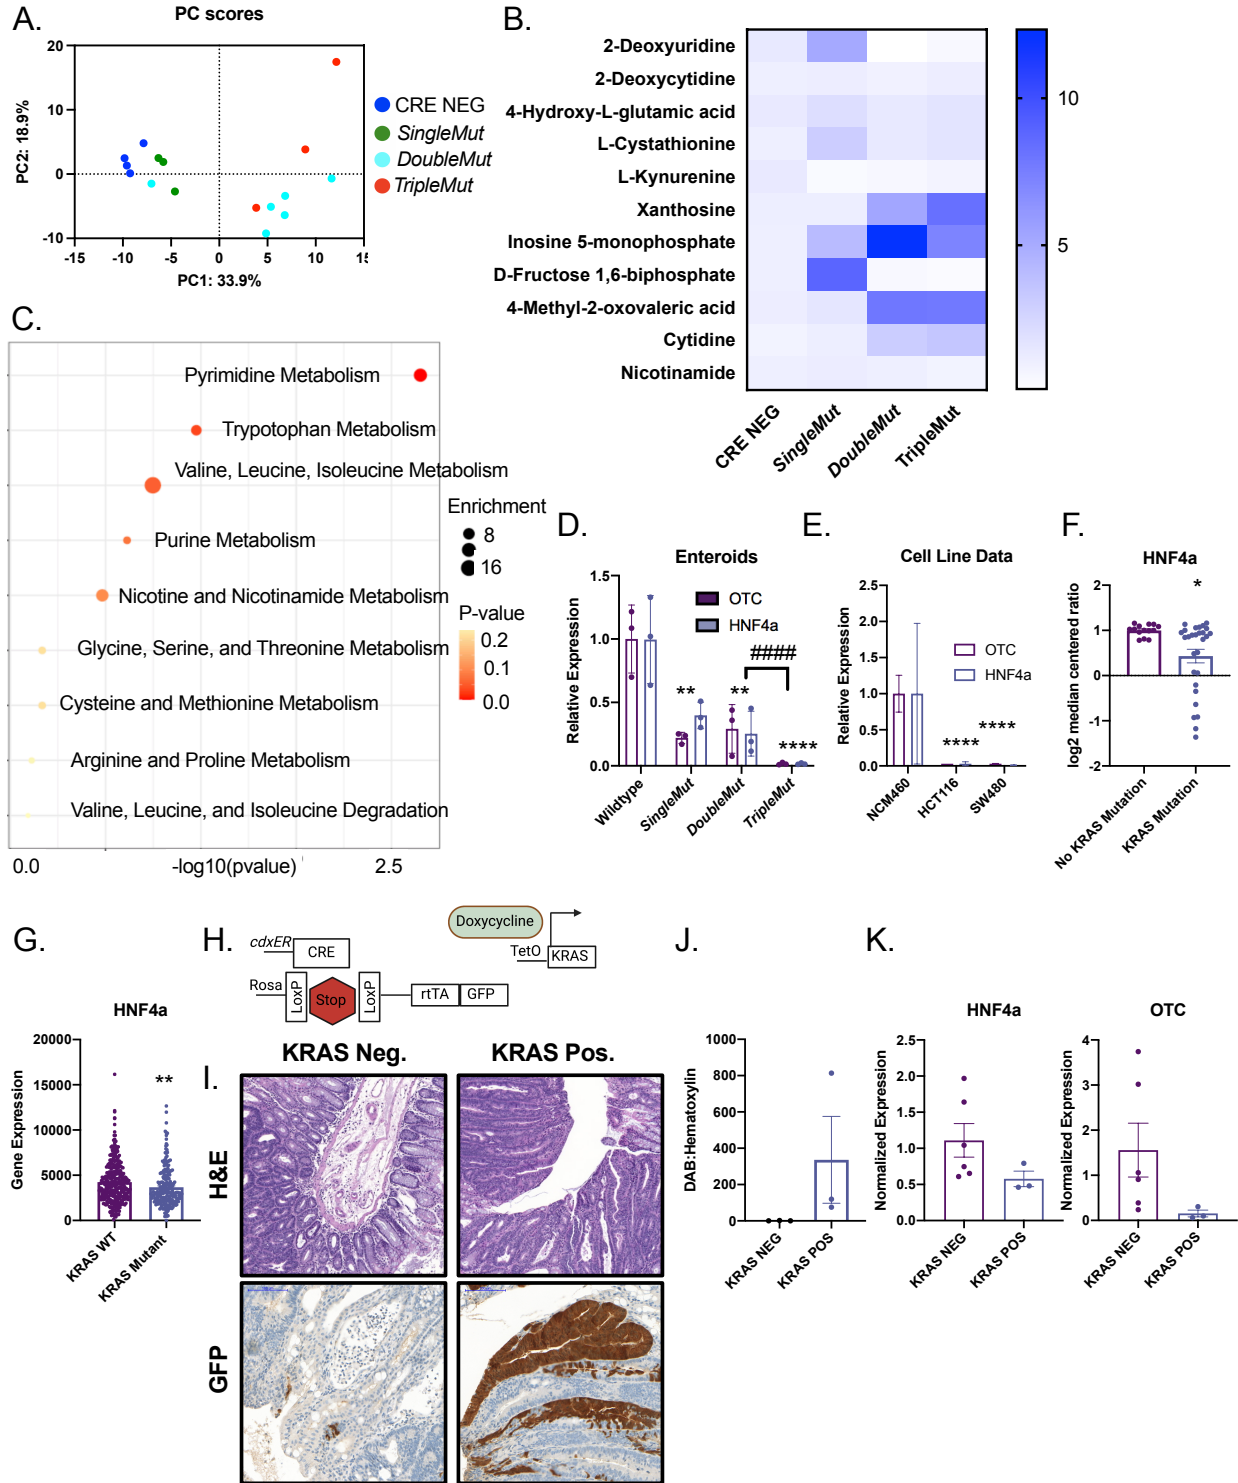

**Figure S3: OTC and HNF4 $\alpha$  are dysregulated in *KRAS* mutant colorectal cancer (Related to Figure 3).** Indicated mice were induced with 3 injections of 100 mg/kg tamoxifen. Colon scrapes were isolated for metabolomics and A) PCA analysis, B) significant metabolite changes, and C) pathway enrichment analysis (n=3-6). D) Expression of OTC and HNF4 $\alpha$  in enteroids from indicated mouse models. E) Expression of OTC and HNF4 $\alpha$  in colorectal and normal colon

cell lines. Expression of HNF4 $\alpha$  in F) cell lines or G) CRC patient samples stratified by *Kras* mutational status. H) Schematic depicting the *iKras* mouse model. I) Representative H&E and GFP immunohistochemistry and J) quantification of GFP staining in *Kras* mutant and *Kras* wild type mice. K) Gene expression for HNF4 $\alpha$  and OTC from *Kras* mutant and *Kras* wild type mice. \*p < 0.05, \*\* p < 0.01, \*\*\* p < 0.001, \*\*\*\* p < 0.0001 unless otherwise indicated. Data is presented as mean  $\pm$  SEM.

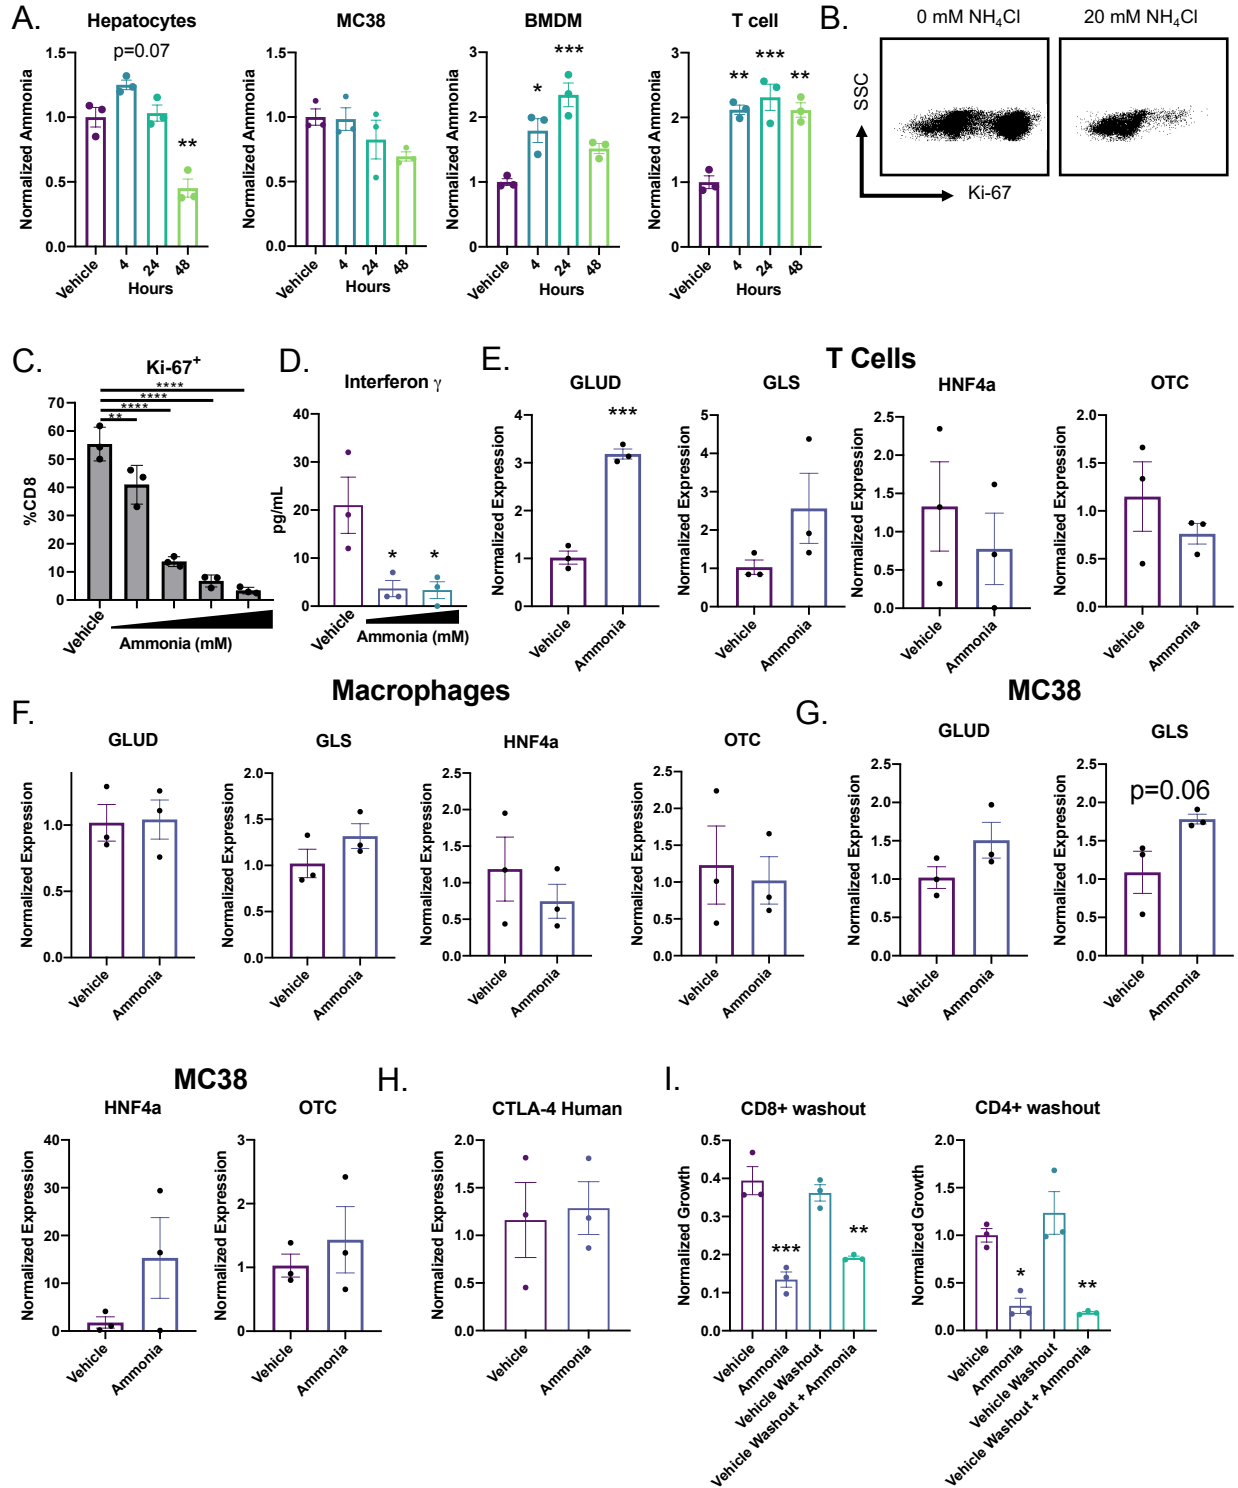

**Figure S4: Ammonia induces a durable reduction in proliferation (Related to Figure 4).** A) Indicated cells were treated for indicated time point with 10 mM ammonia, then washed with PBS, lysed, deproteinated, and an ammonia assay was performed. BMDM is bone marrow derived macrophages. B and C) Representative plot and quantification of Ki67 expression in

ammonia treated CD8<sup>+</sup> T cells. D) ELISA of supernatant of ammonia treated T cells after 12 h ammonia treatment. Gene expression analysis for urea cycle and glutamine metabolism in E) murine T cells, F) murine bone marrow derived macrophages and G) MC38 murine colon cancer cell line. H) Gene expression analysis in human T cells treated with ammonia for 72 h. I) T cells were plated with ammonia for 24 h, then the ammonia was washed off and T cells were replated in fresh media with no ammonia then assessed for proliferation. \*p < 0.05, \*\* p < 0.01, \*\*\* p < 0.001, \*\*\*\* p < 0.0001 unless otherwise indicated. Data is presented as mean ± SEM. All experiments were performed in triplicates at least three times.

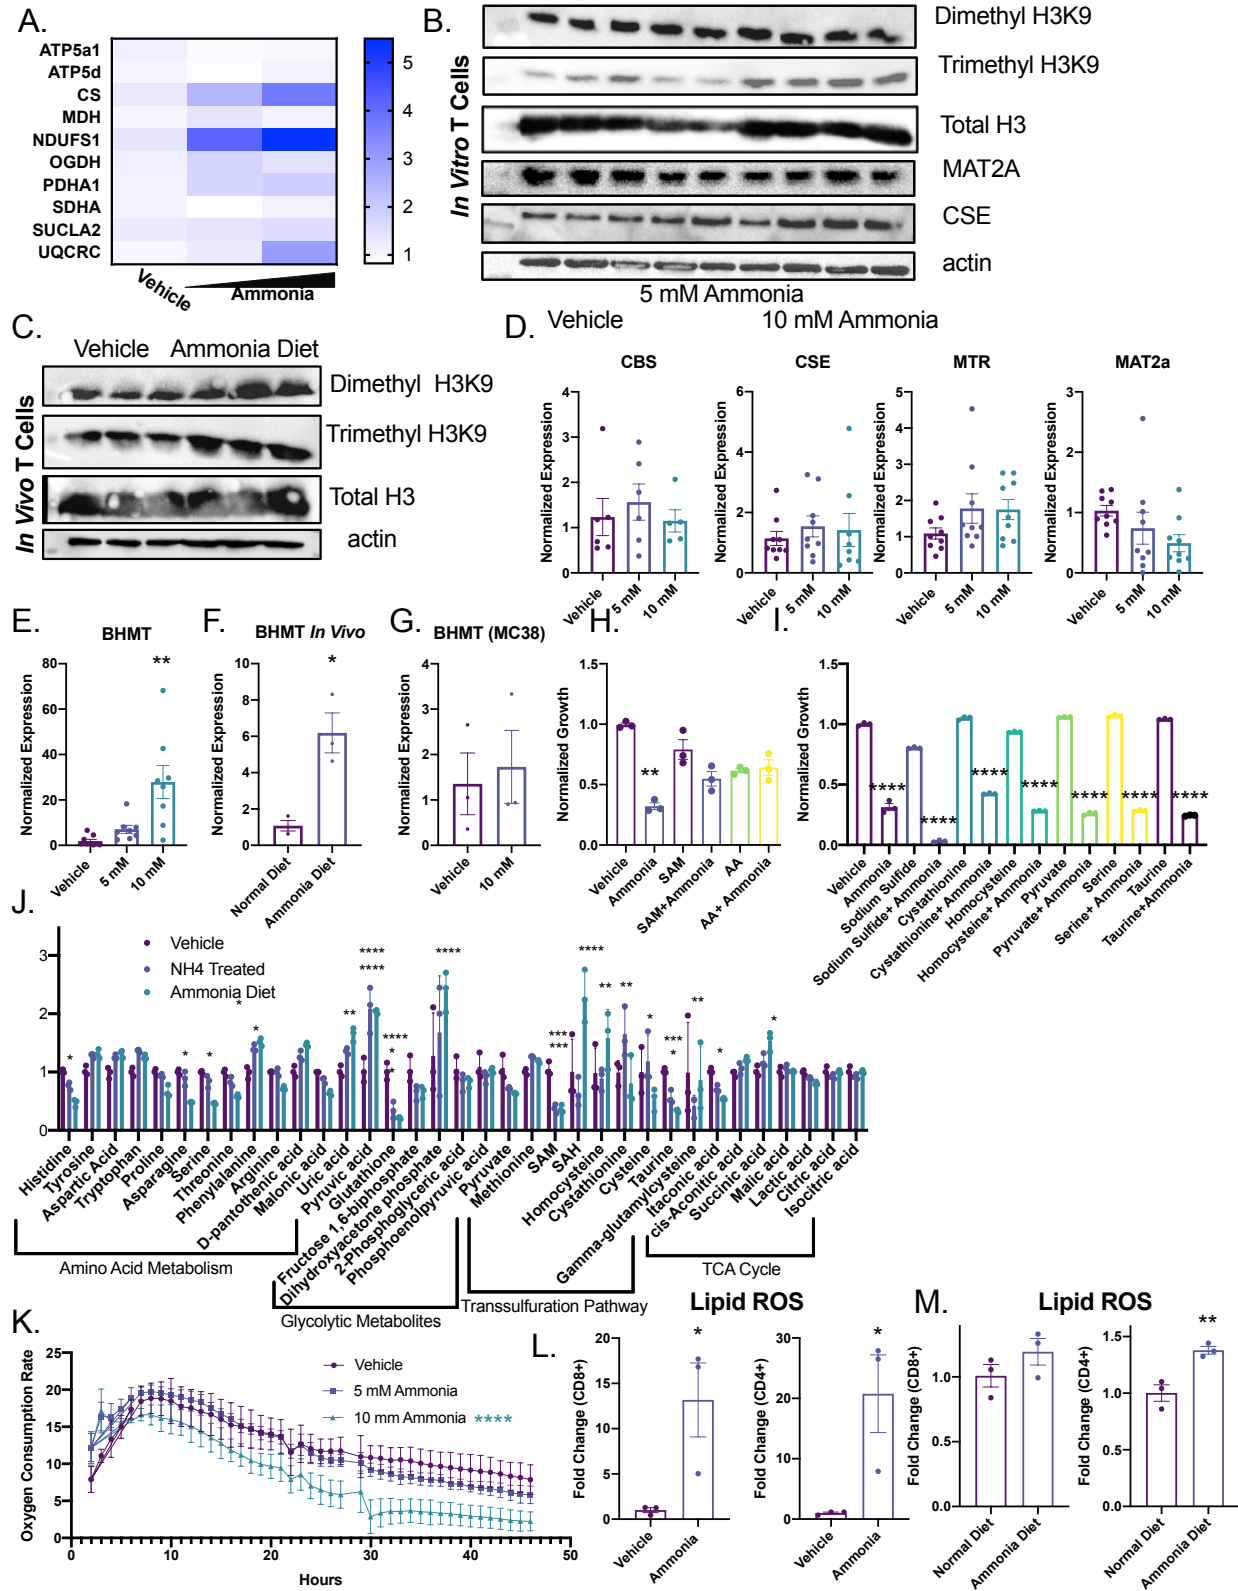

**Figure S5: Ammonia alters T Cell metabolism (Related to Figure 5).** A) Gene expression of TCA cycle, glycolysis, and oxidative phosphorylation enzymes in T cells treated with the

indicated ammonia concentrations for 72 hours. B and C) Western blot analysis on *in vivo* and *in vitro* ammonia treated T cells with indicated antibody (n=3). D) T cells were treated with indicated ammonia concentration E) for 24 h or F) ammonium acetate diet for 7 days and gene expression was assessed. G) MC38 cells were treated with 10 mM ammonia for 24 h, then analyzed for gene expression. H and I) T cells were treated with indicated compounds for 24 h (SAM, 50  $\mu$ M; cystathionine, 500  $\mu$ M; amino acids (AA), 200  $\mu$ M; sodium sulfide, 200  $\mu$ M; homocysteine, 500  $\mu$ M; pyruvate 1 mM; serine, 500  $\mu$ M; taurine, 500  $\mu$ M) then incubated with 10 mM ammonia for 24 h. J) Quantification of selected metabolites from 5B, significance indicated by asterisks is most significant two way comparison. K) T cells were isolated, treated with ammonia, and the oxygen consumption rate was measured every hour for 48 hours. L) T cells were treated with ammonia and lipid ROS was assessed by flow cytometry. M) Mice were treated with ammonium acetate diet for 7 days, and isolated T cells were assessed for lipid ROS by flow cytometry (n=3). \*p < 0.05, \*\* p < 0.01, \*\*\* p < 0.001, \*\*\*\* p < 0.0001 unless otherwise indicated. Data is presented as mean  $\pm$  SEM. All cell experiments were performed in triplicates at least three times.



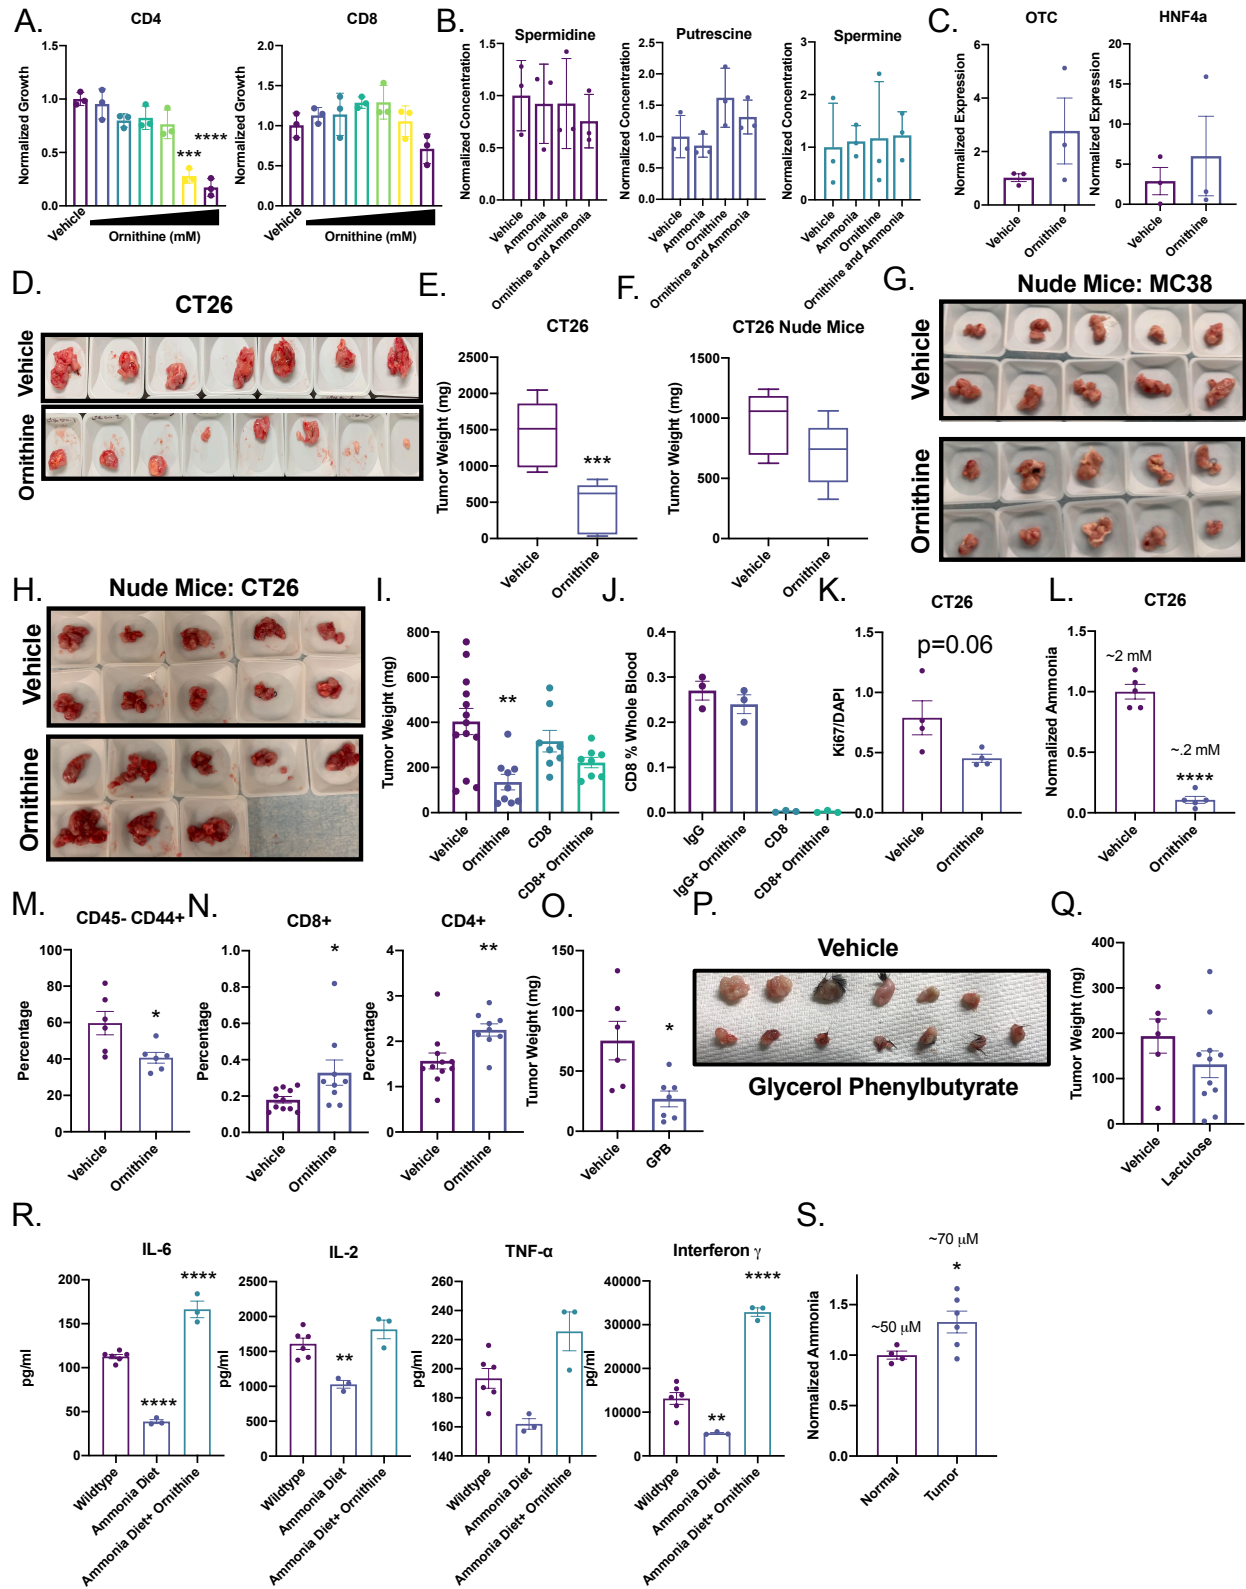

**Figure S6: Ammonia neutralization of colorectal cancer tumor growth is T cell dependent (Related to Figure 6).** A) CD4<sup>+</sup> and CD8<sup>+</sup> T cells treated *in vitro* with ornithine (.001 mM-10

mM). B) Polyamine levels in T cells treated with ammonia (10 mM) and ornithine (.1 mM) for 24 hours. C) Gene expression of T cells treated with ornithine. D and E) Syngeneic tumor study in BALB/C or F) athymic nude mice with CRC-derived CT26 cells following ornithine treatment (10 mM ornithine intraperitoneally (n=8-10). G and H) Representative images of MC38 and CT26 tumors excised from nude mice. I) Mice were treated with CD8 depleting antibody every 3 days, and ornithine intraperitoneally daily, then tumor size was calculated. J) Peripheral blood flow from mice treated with IgG, IgG and ornithine, or CD8 depleting antibody. Quantification of K) KI67 and L) ammonia in tumors from CT26 (n=3). M and N) T cells numbers in tumors 5 days after ornithine treatment from MC38 implanted syngeneic tumors. (n=4-6). O) Tumor weight and P) images after treatment with glycerol phenylbutyrate daily (n=4). Q) Syngeneic tumor study in C57BL/J mice with CRC-derived MC38 cells following lactulose treatment (n=4-5). R) Mice were placed on ammonium acetate diet for 7 days, then CD3<sup>+</sup> splenic T cells were isolated and plated *ex vivo* for 24 h. The supernatants were collected, and an ELISA performed for the indicated cytokine. S) Serum was collected from tumor and normal mice and ammonia was quantified (n=3). \*p < 0.05, \*\* p < 0.01, \*\*\* p < 0.001, \*\*\*\* p < 0.0001 unless otherwise indicated. Data is presented as mean ± SEM. All experiments were performed in triplicates at least three times.

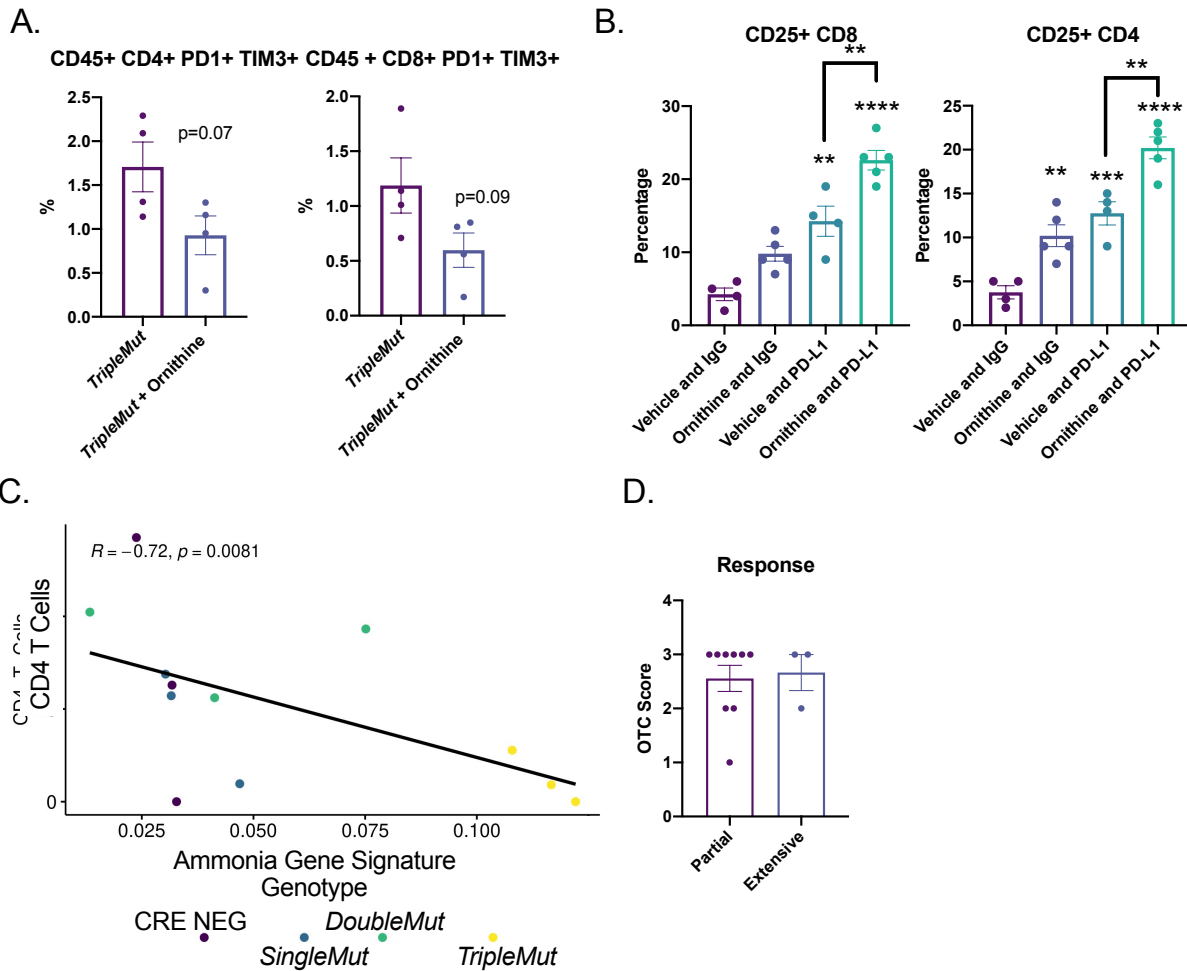

**Figure S7: High ammonia levels are associated with increased T cell exhaustion (Related to Figure 7).** A) Flow populations from colons of induced *TripleMut* mice treated with ornithine and stained for the indicated population (n=3). B) Flow for various cell populations from *TripleMut* mice treated with ornithine, IgG, or anti-PD-L1 therapy for 7 days. (n=3). C) RNA-SEQ samples were evaluated for expression of our ammonia gene signature. Cell populations were deconvoluted using single cell data and compared to the ammonia gene signature (n=3). D) OTC IHC expression grouped into partial or extensive chemotherapy response. Survival significance is calculated using log-rank test. \*p < 0.05, \*\* p < 0.01, \*\*\* p < 0.001, \*\*\*\* p < 0.0001 unless otherwise indicated. Data is presented as mean  $\pm$  SEM. All experiments were performed in triplicates at least three times.
